# Supplementary material for: A Non-Hydrolytic Sol–Gel Route to Organic-Inorganic Hybrid Polymers: Linearly Expanded Silica and Silsesquioxanes
Source: MDPI journal article supplement (doi:10.3390/gels9040291), 2023-04-02
Supplement: s1 [file s1]

# Supplementary Material

## A Non-Hydrolytic Sol-Gel Route to Organic-Inorganic Hybrid Polymers: Linearly Expanded Silica and Silsesquioxanes

Katrin Krupinski <sup>1</sup>, Jörg Wagler <sup>1</sup>, Erica Brendler <sup>2</sup> and Edwin Kroke <sup>1,\*</sup>

<sup>1</sup> Technische Universität Bergakademie Freiberg (TUBAF), Department of Chemistry and Physics, Institute for Inorganic Chemistry, Leipziger Strasse 29, 09596 Freiberg, Germany

<sup>2</sup> Technische Universität Bergakademie Freiberg (TUBAF), Department of Chemistry and Physics, Institute for Analytical Chemistry, Leipziger Strasse 29, 09596 Freiberg, Germany

\* Correspondence: edwin.kroke@chemie.tu-freiberg.de; Tel.: +49-3731-39-3174; Fax: -4058

### Contents

**Figure S1.** <sup>29</sup>Si solution NMR spectrum of **1b** (**1** with CH<sub>3</sub>SiCl<sub>3</sub>) after 1 day at room temperature.

**Figure S2.** <sup>29</sup>Si solution NMR spectra of reaction mixture **1b** (**1**/CH<sub>3</sub>SiCl<sub>3</sub>/THF), top: after 1 day; center: after 8 days; bottom: after 30 days at room temperature.

**Figure S3.** <sup>29</sup>Si solution NMR spectra of reaction mixture **2b** (**2**/CH<sub>3</sub>SiCl<sub>3</sub>/THF), top: after 1 day; center: after 8 days; bottom: after 30 days at room temperature.

**Figure S4.** <sup>29</sup>Si solution NMR spectra of reaction mixture **2bPy** (**2**/CH<sub>3</sub>SiCl<sub>3</sub>/pyridine/THF), top: after 9 hours; center: after 6 days; bottom: after 27 days at room temperature.

**Figure S5.** <sup>29</sup>Si solution NMR spectra (glass signal removed by baseline correction) of reaction mixtures **1a** (**1**/SiCl<sub>4</sub>/pyridine/THF) [top: full spectrum of (**a**) the mixture after 9 hours and (**a'**) after 7 days]. Magnified sections with signal assignment are shown in (**b**) and (**c**) for spectrum (**a**), in (**b'**) and (**c'**) for spectrum (**a'**).

**Figure S6.** <sup>29</sup>Si solution NMR spectra (glass signal removed by baseline correction) of reaction mixtures **2a** (**2**/SiCl<sub>4</sub>/pyridine/THF) [top: full spectrum of (**a**) the mixture after 18 hours and (**a'**) after 7 days]. Magnified sections with signal assignment are shown in (**b**) and (**c**) for spectrum (**a**), in (**b'**) and (**c'**) for spectrum (**a'**).

**Figure S7.** Molecular structure of **2** in the crystal (thermal displacement ellipsoids plotted at the 50 % probability level, H-atoms are omitted for clarity). The bond C1–C1\* of the molecule is located on a crystallographic center of inversion, the atoms of the asymmetric unit are labeled, the asterisk \* indicates a symmetry equivalent position.

**Table S1.** Bond lengths [Å] of compound **2** (in its crystal structure).

**Table S2.** Bond angles [deg.] of compound **2** (in its crystal structure).

**Table S3.** Torsion angles [deg.] of compound **2** (in its crystal structure).

**Figure S8.** Xerogel **1A** after drying at 60 °C in vacuum for several hours.

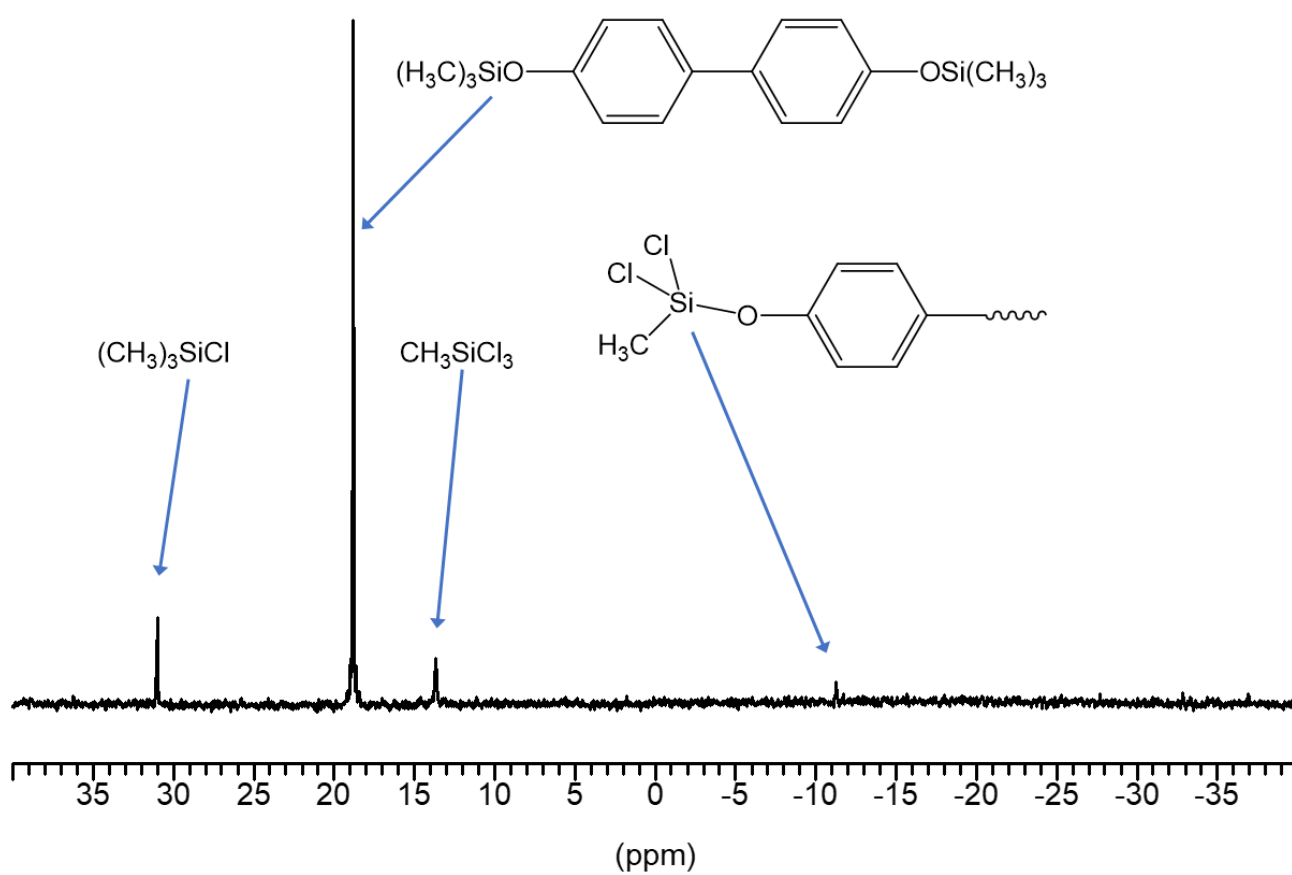

**Figure S1.**  $^{29}\text{Si}$  solution NMR spectrum of **1b** (**1** with  $\text{CH}_3\text{SiCl}_3$ ) after 1 day at room temperature.

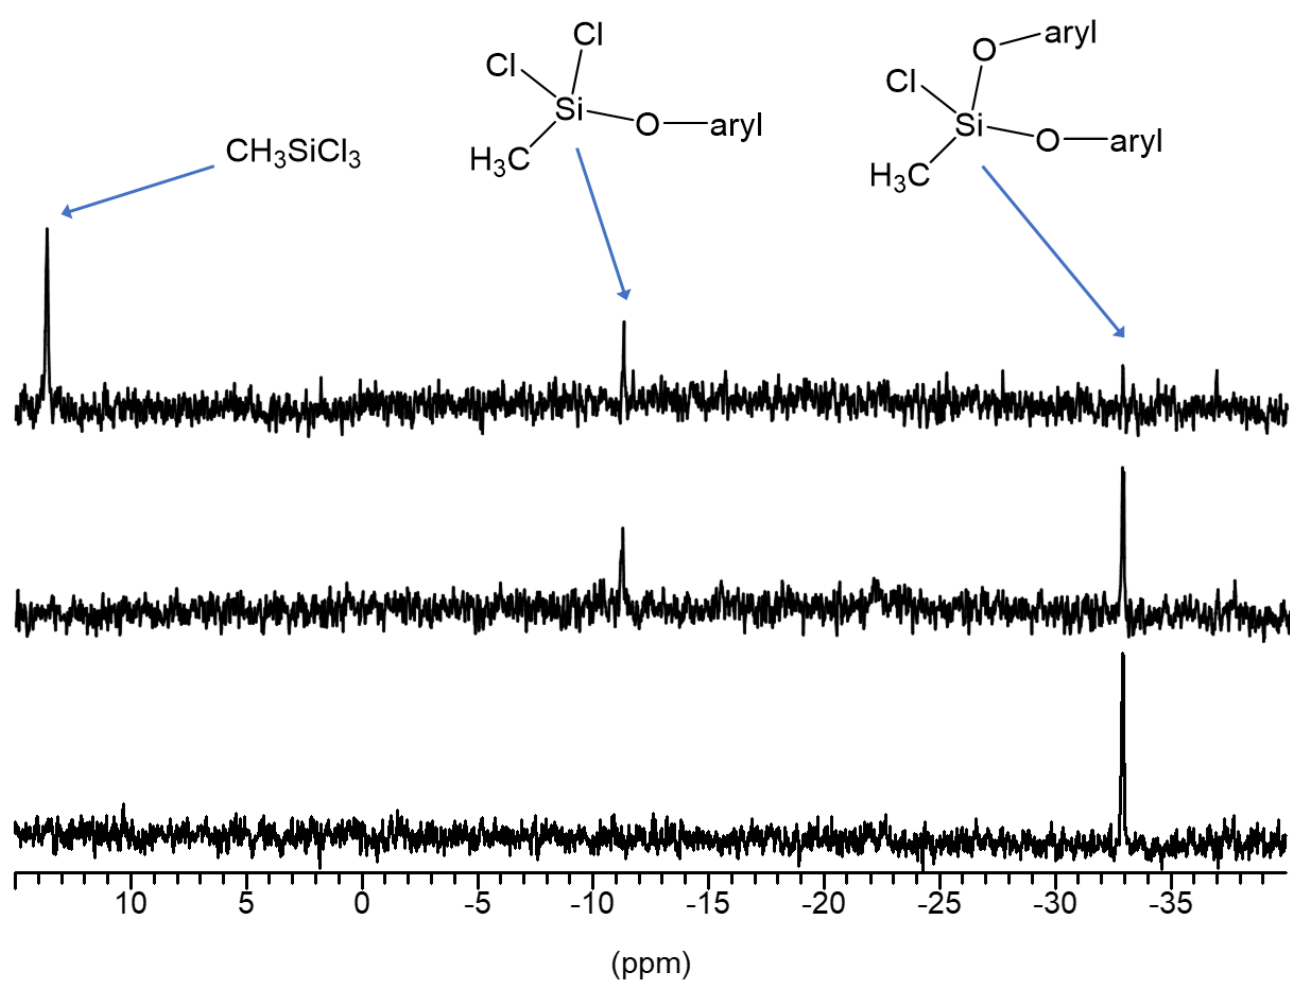

**Figure S2.**  $^{29}\text{Si}$  solution NMR spectra of reaction mixture **1b** (1/ $\text{CH}_3\text{SiCl}_3$ /THF), top: after 1 day; center: after 8 days; bottom: after 30 days at room temperature.

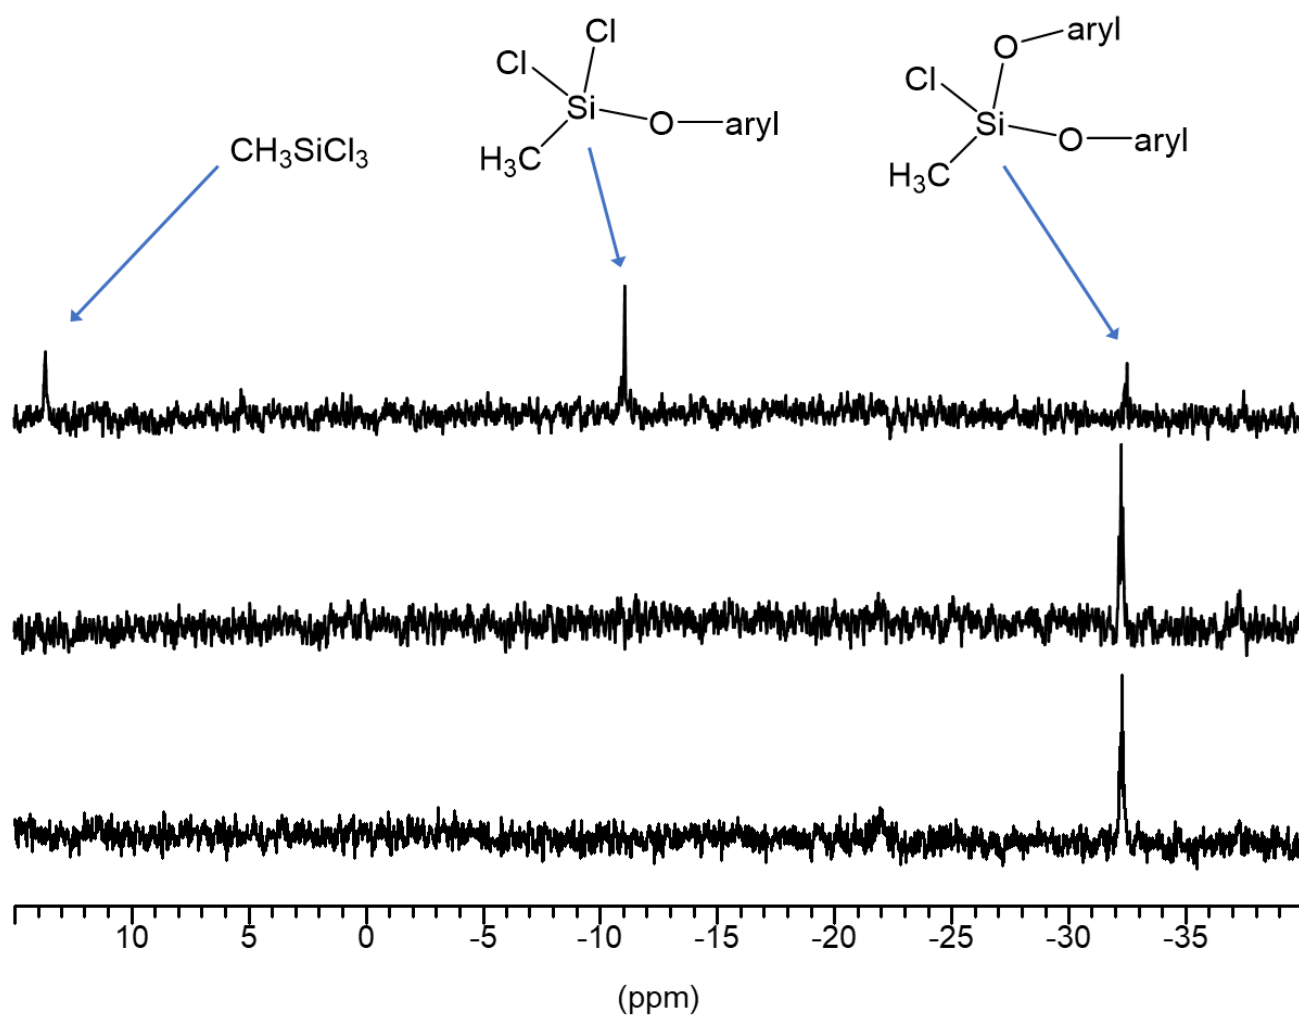

**Figure S3.**  $^{29}\text{Si}$  solution NMR spectra of reaction mixture **2b** (**2**/ $\text{CH}_3\text{SiCl}_3$ /THF), top: after 1 day; center: after 8 days; bottom: after 30 days at room temperature.

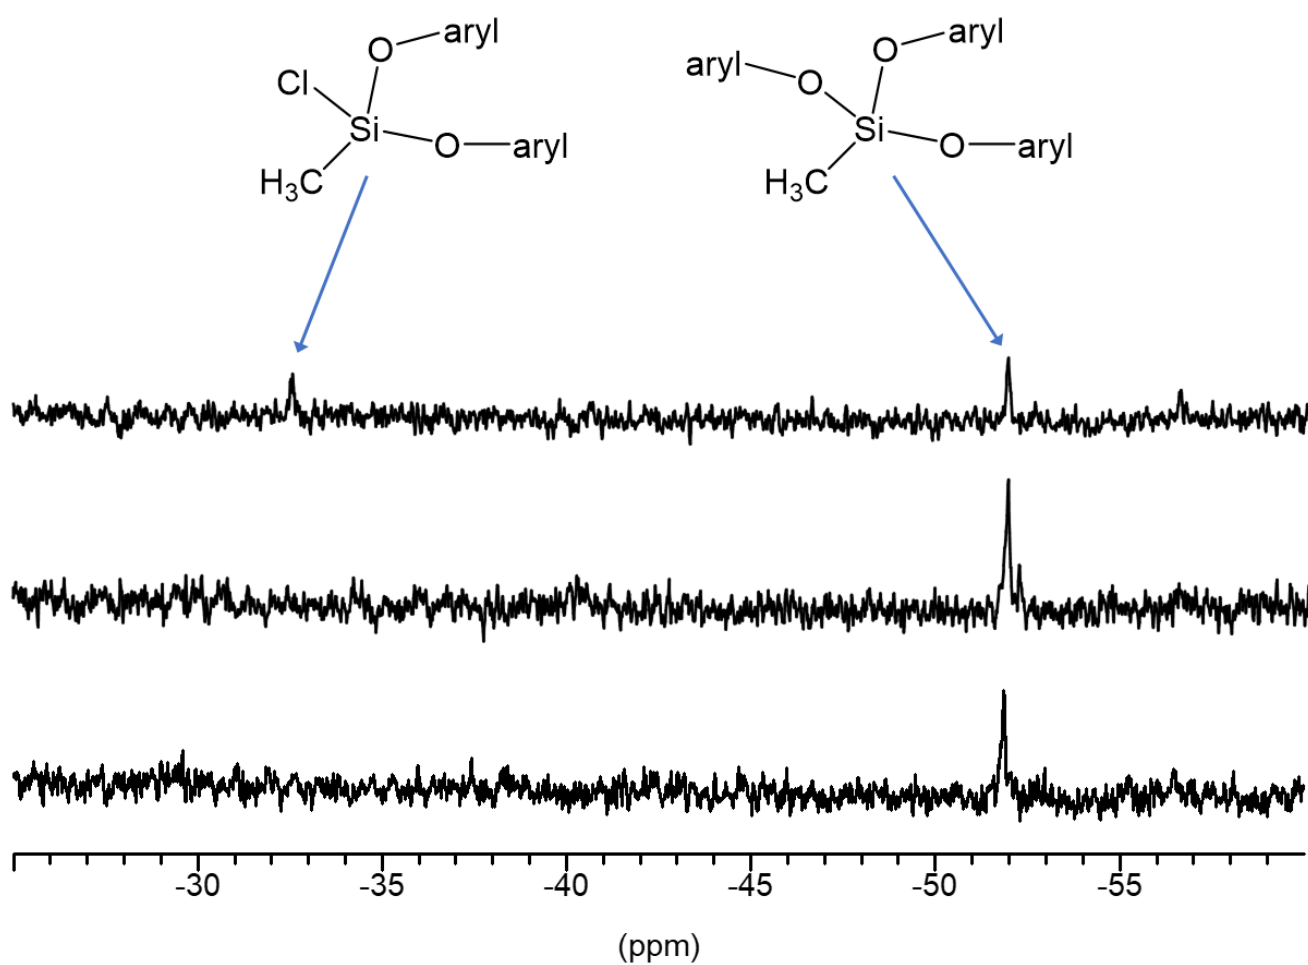

**Figure S4.**  $^{29}\text{Si}$  solution NMR spectra of reaction mixture **2bPy** (**2**/ $\text{CH}_3\text{SiCl}_3$ /pyridine/THF), top: after 9 hours; center: after 6 days; bottom: after 27 days at room temperature.

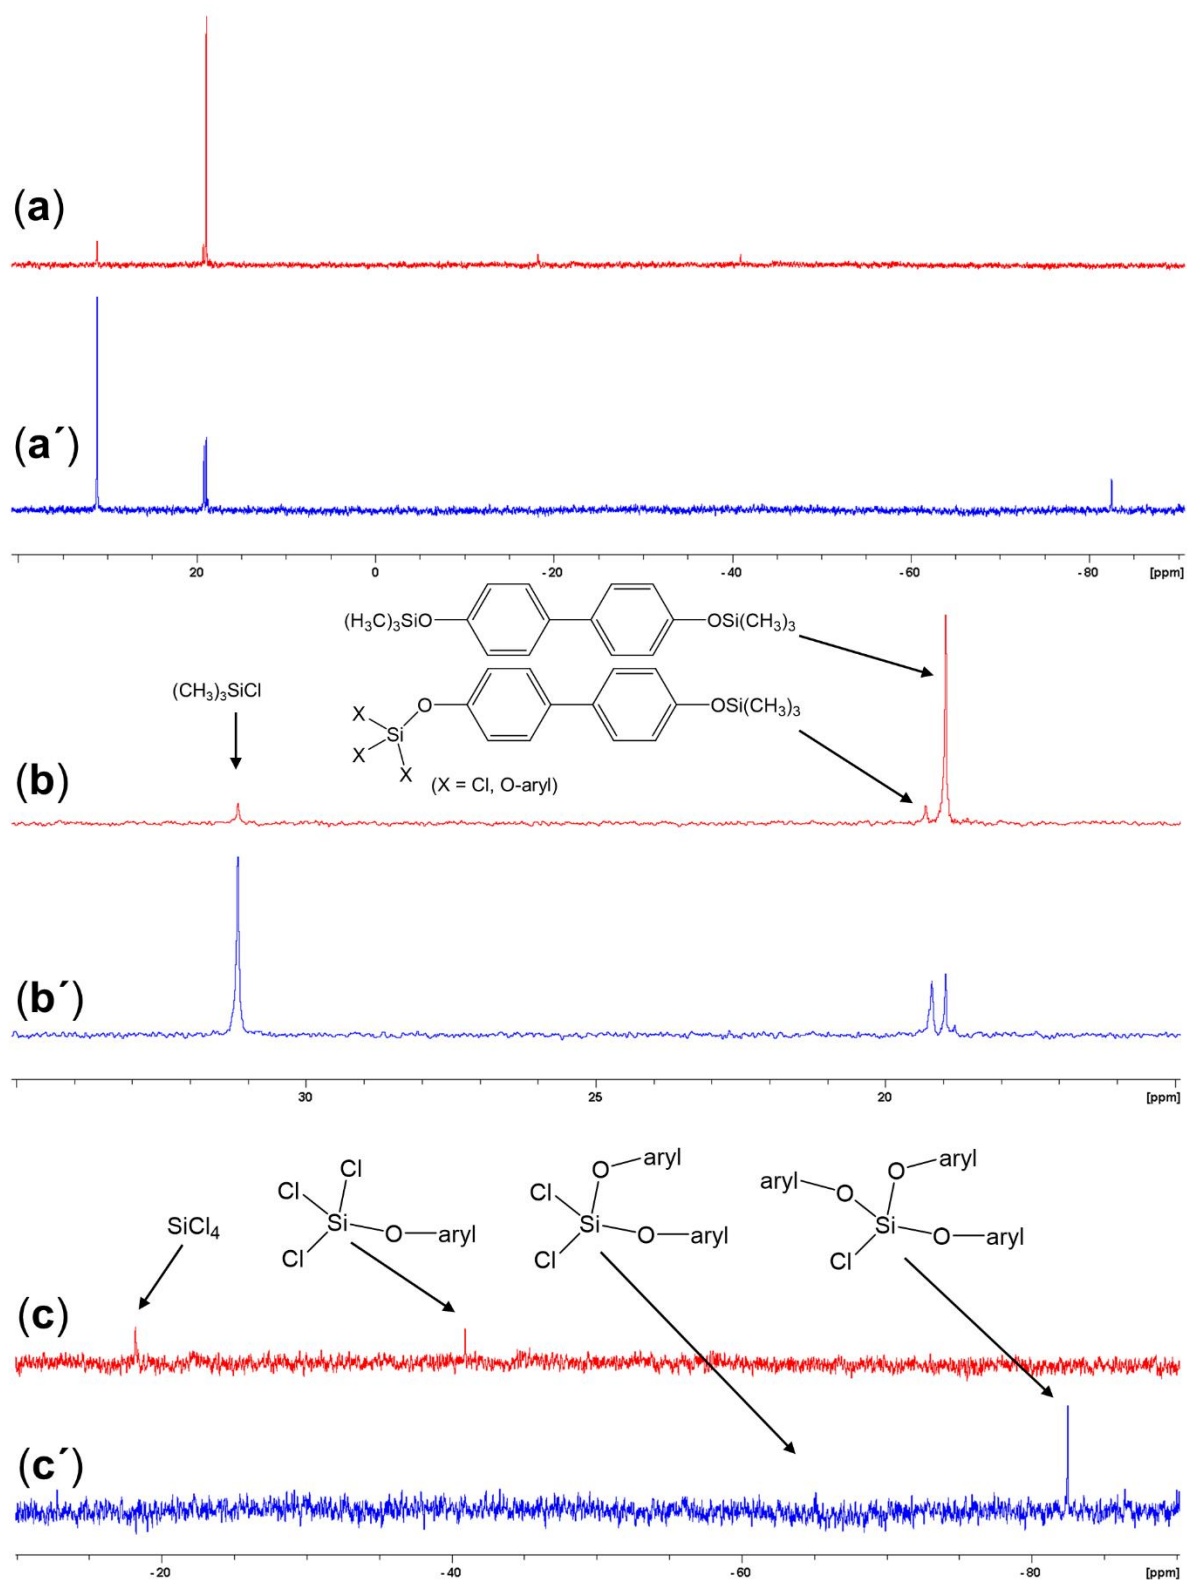

**Figure S5.**  $^{29}\text{Si}$  solution NMR spectra (glass signal removed by baseline correction) of reaction mixtures **1a** (1/ $\text{SiCl}_4$ /pyridine/THF) [top: full spectrum of (a) the mixture after 9 hours and (a') after 7 days]. Magnified sections with signal assignment are shown in (b) and (c) for spectrum (a), in (b') and (c') for spectrum (a').

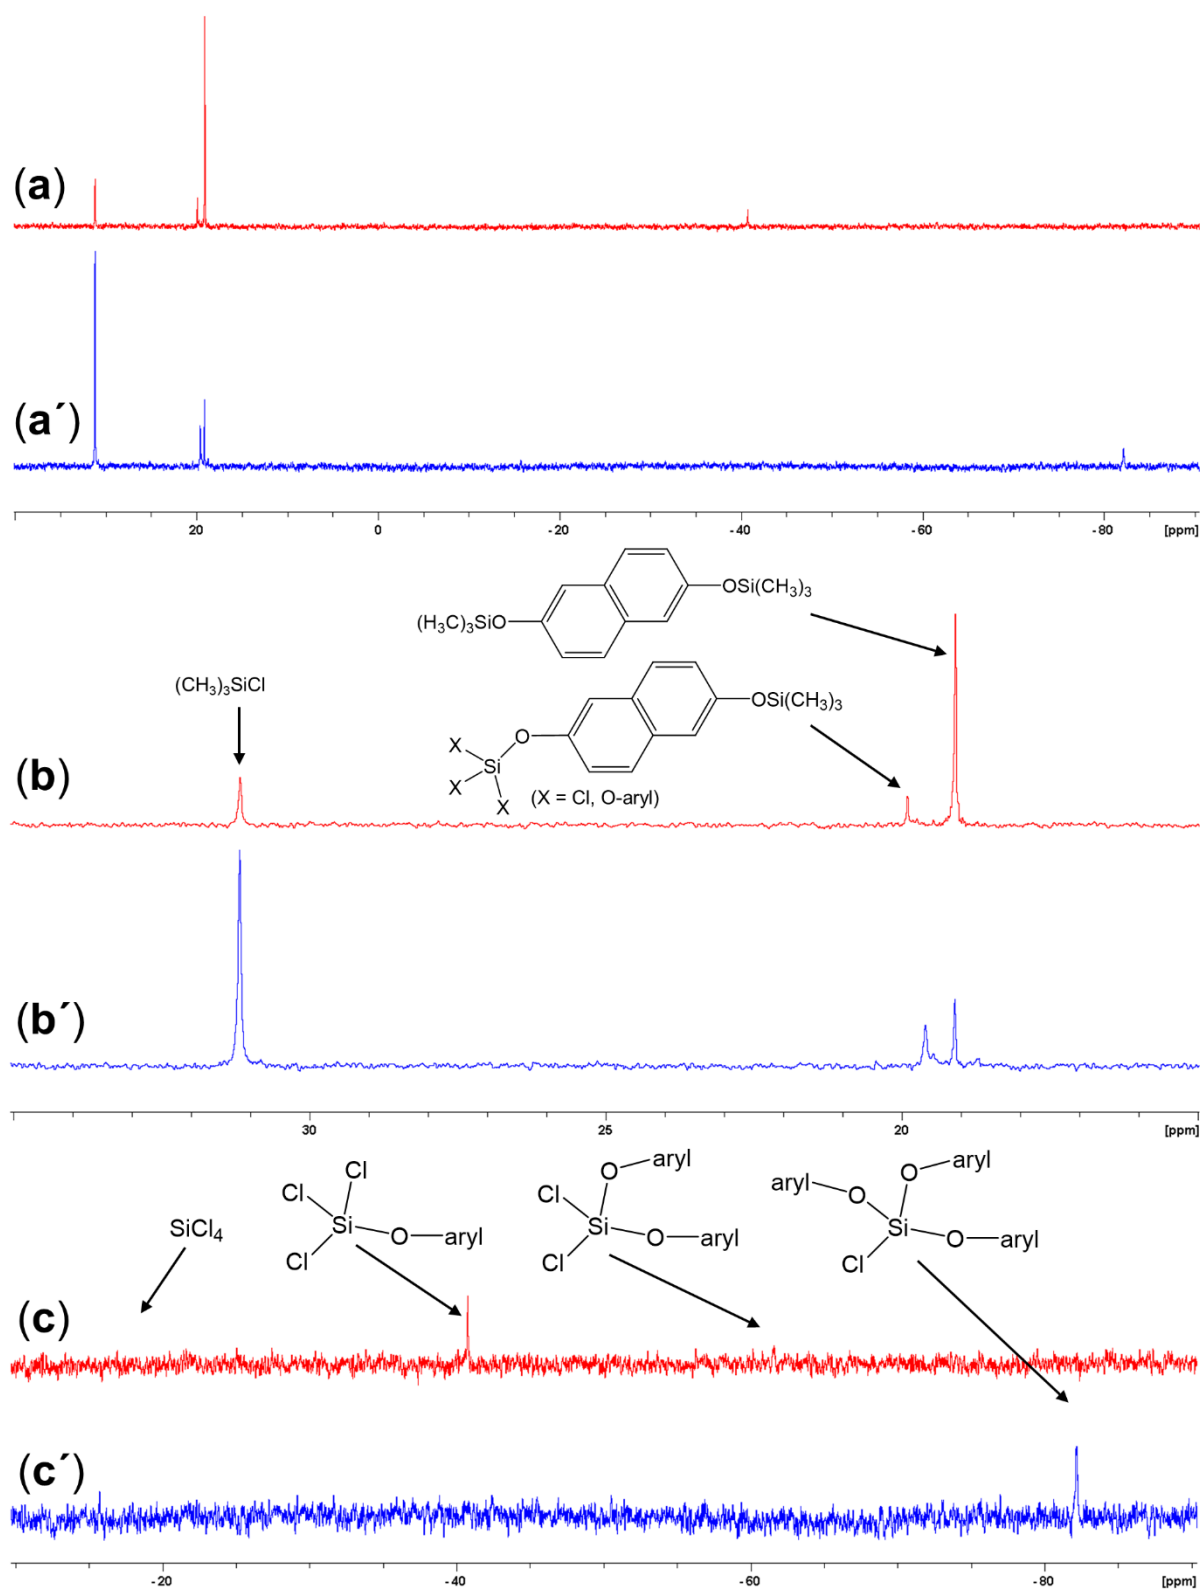

**Figure S6.**  $^{29}\text{Si}$  solution NMR spectra (glass signal removed by baseline correction) of reaction mixtures **2a** ( $2/\text{SiCl}_4/\text{pyridine}/\text{THF}$ ) [top: full spectrum of (a) the mixture after 18 hours and (a') after 7 days]. Magnified sections with signal assignment are shown in (b) and (c) for spectrum (a), in (b') and (c') for spectrum (a').

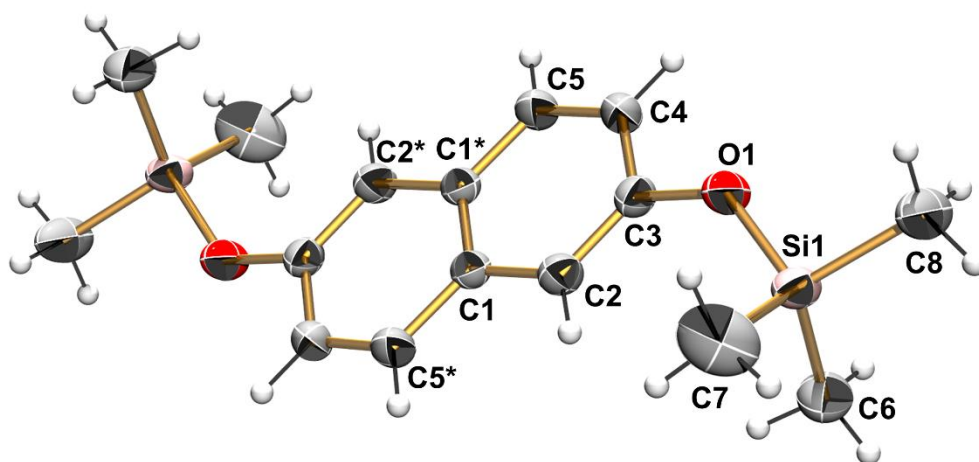

**Figure S7.** Molecular structure of **2** in the crystal (thermal displacement ellipsoids plotted at the 50 % probability level, H-atoms are omitted for clarity). The bond C1–C1\* of the molecule is located on a crystallographic center of inversion, the atoms of the asymmetric unit are labeled, the asterisk \* indicates a symmetry equivalent position.

**Table S1.** Bond lengths [Å] of compound **2** (in its crystal structure).

| Bond       | Bond Length | Bond      | Bond Length |
|------------|-------------|-----------|-------------|
| Si(1)–O(1) | 1.6575(11)  | C(1)–C(2) | 1.4239(18)  |
| Si(1)–C(6) | 1.8436(18)  | C(4)–C(5) | 1.3635(19)  |
| Si(1)–C(8) | 1.8521(17)  | C(4)–C(3) | 1.4153(19)  |
| Si(1)–C(7) | 1.853(2)    | C(3)–C(2) | 1.3641(19)  |
| C(1)–C(5)* | 1.4127(18)  | C(3)–O(1) | 1.3707(16)  |
| C(1)–C(1)* | 1.413(2)    |           |             |

**Table S2.** Bond angles [deg.] of compound **2** (in its crystal structure).

| Atoms            | Bond Angle | Atoms           | Bond Angle |
|------------------|------------|-----------------|------------|
| O(1)–Si(1)–C(6)  | 109.65(8)  | C(1)*–C(1)–C(2) | 119.17(15) |
| O(1)–Si(1)–C(8)  | 102.31(7)  | C(5)–C(4)–C(3)  | 120.59(12) |
| C(6)–Si(1)–C(8)  | 112.00(10) | C(2)–C(3)–O(1)  | 124.00(13) |
| O(1)–Si(1)–C(7)  | 110.45(10) | C(2)–C(3)–C(4)  | 120.02(12) |
| C(6)–Si(1)–C(7)  | 111.02(11) | O(1)–C(3)–C(4)  | 115.96(12) |
| C(8)–Si(1)–C(7)  | 111.09(11) | C(3)–C(2)–C(1)  | 120.51(12) |
| C(5)*–C(1)–C(1)* | 118.97(15) | C(3)–O(1)–Si(1) | 132.31(9)  |
| C(5)*–C(1)–C(2)  | 121.86(12) | C(4)–C(5)–C(1)* | 120.74(12) |

**Table S3.** Torsion angles [deg.] of compound **2** (in its crystal structure). Because of the crystallographically imposed inversion symmetry, torsion angles C(2)–C(1)–C(1)\*–C(2)\* and C(5)–C(1)–C(1)\*–C(5)\* are 180 deg. by definition.

| Atoms                | Torsion Angle | Atoms                | Torsion Angle |
|----------------------|---------------|----------------------|---------------|
| C(5)–C(4)–C(3)–C(2)  | -0.2(2)       | C(2)–C(3)–O(1)–Si(1) | 22.4(2)       |
| C(5)–C(4)–C(3)–O(1)  | -178.69(14)   | C(4)–C(3)–O(1)–Si(1) | -159.10(12)   |
| O(1)–C(3)–C(2)–C(1)  | 178.12(13)    | C(6)–Si(1)–O(1)–C(3) | 52.61(17)     |
| C(4)–C(3)–C(2)–C(1)  | -0.3(2)       | C(8)–Si(1)–O(1)–C(3) | 171.64(16)    |
| C(5)*–C(1)–C(2)–C(3) | -179.78(13)   | C(7)–Si(1)–O(1)–C(3) | -70.04(17)    |
| C(1)*–C(1)–C(2)–C(3) | 0.5(2)        | C(3)–C(4)–C(5)–C(1)* | 0.4(2)        |



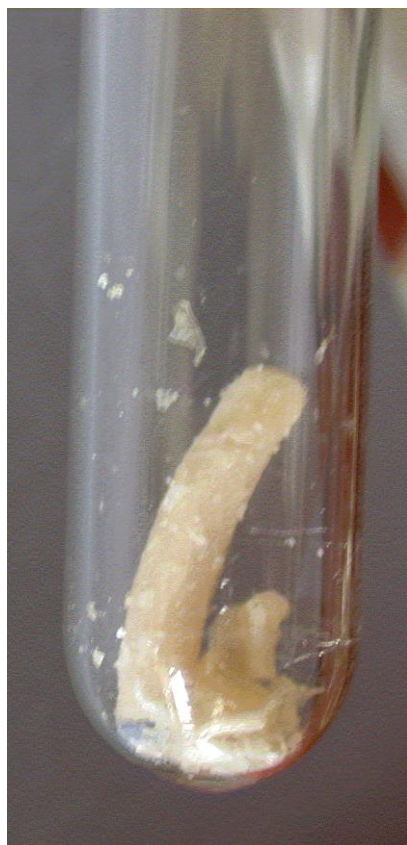

**Figure S8.** Xerogel 1A after drying at 60 °C in vacuum for several hours.
